# Supplementary material for: An innovative transportable immune device for the recognition of α-synuclein using KCC-1-nPr-CS2 modified silver nano-ink: integration of pen-on-paper technology with biosensing toward early-stage diagnosis of Parkinson's disease
Source: Royal Society of Chemistry journal article supplement (doi:10.1039/d3ra07058a), 2024-01-01
Supplement: d3ra07058a1.pdf [file d3ra07058a1.pdf]

## Supporting information

### **An innovative transportable immune-device for the recognition of $\alpha$ -Synuclein using KCC-1-*nPr*-CS<sub>2</sub> modified silver nano-ink: Integration of pen-on-paper technology with biosensing toward early-stage diagnosis of Parkinson**

Arezoo Saadati <sup>a,b</sup>, Hossein Navay Baghban <sup>c</sup>, Mohammad Hasanzadeh <sup>d,\*</sup>, Nasrin Shadjou <sup>e</sup>

<sup>a</sup> Central European Institute of Technology, Brno University of Technology, Brno CZ-612 00, Czech Republic

<sup>b</sup> Nutrition Research Center, Tabriz University of Medical Sciences, Tabriz, Iran.

<sup>c</sup> Food and Drug Safety Research Center, Tabriz University of Medical Sciences, Tabriz, Iran.

<sup>d</sup> Pharmaceutical Analysis Research Center, Tabriz University of Medical Sciences, Tabriz, Iran

<sup>e</sup> Department of Nanotechnology, Faculty Chemistry, Urmia University, Urmia, Iran.

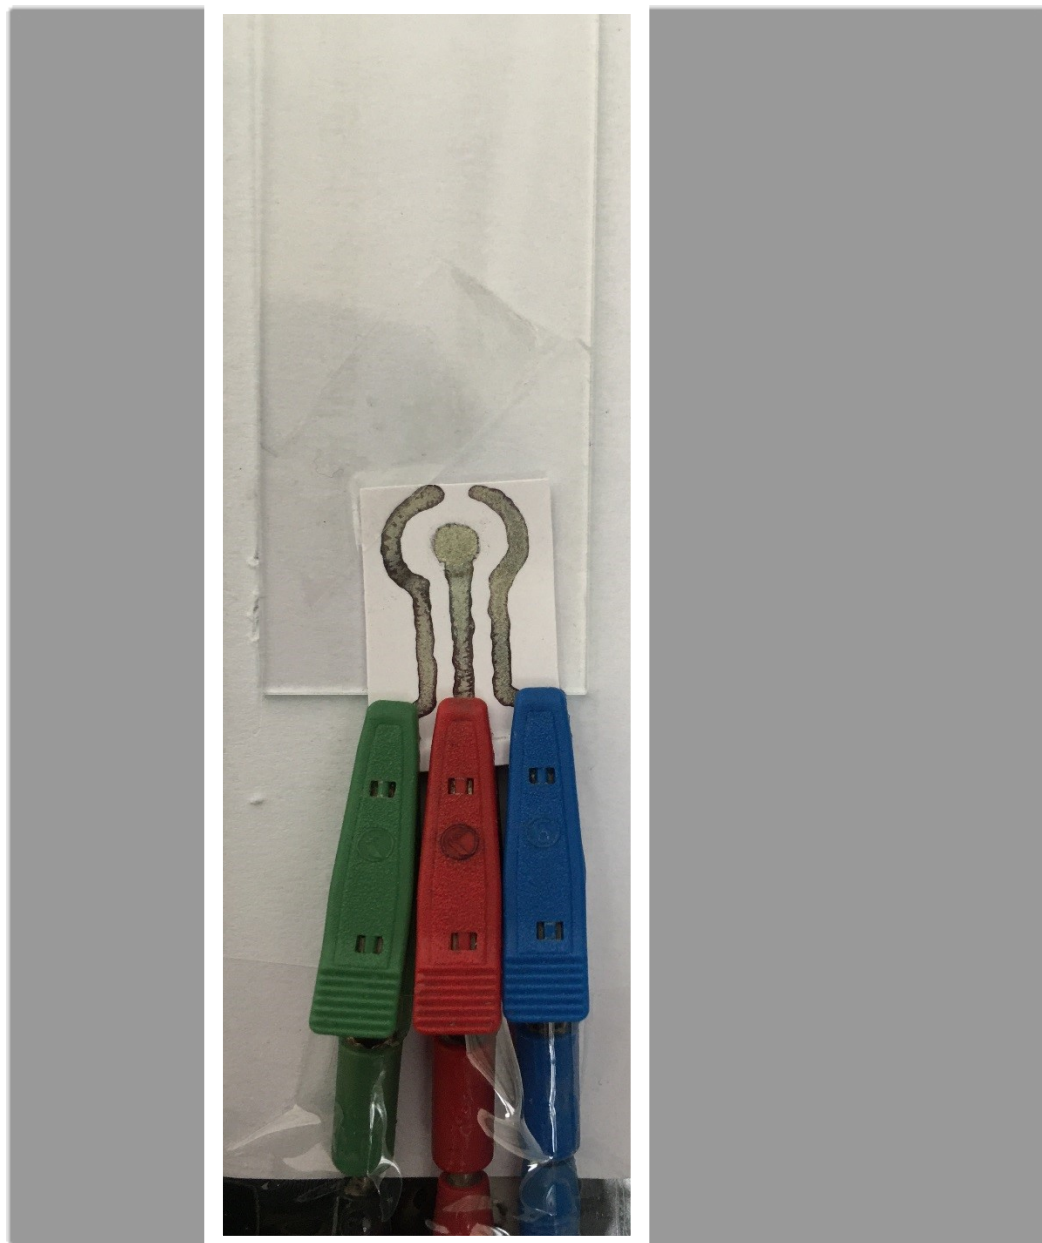

**Scheme S1.** Indicates the connection of the designed three-electrode system by conductive Ag-ink (reference, working and counter electrode) to the electrochemical device.

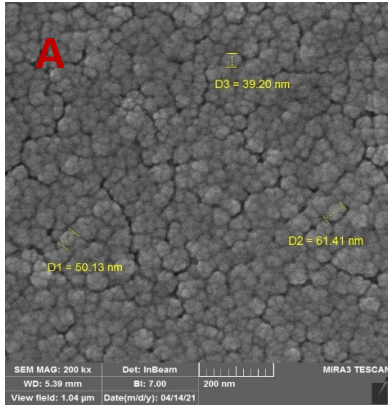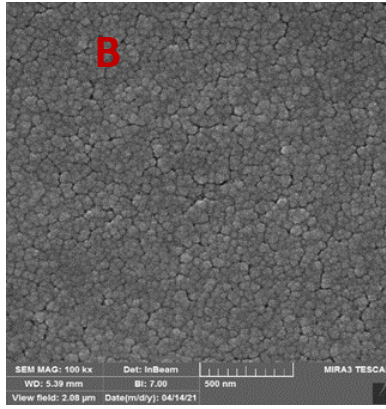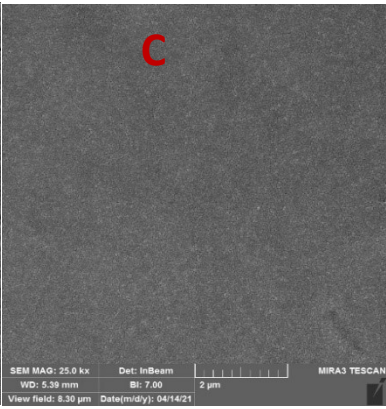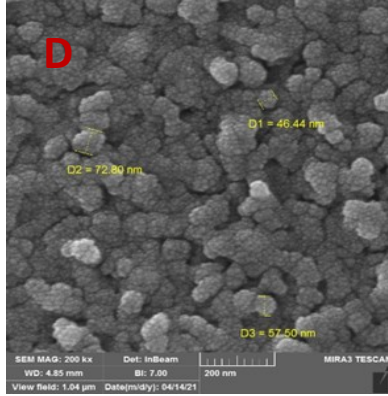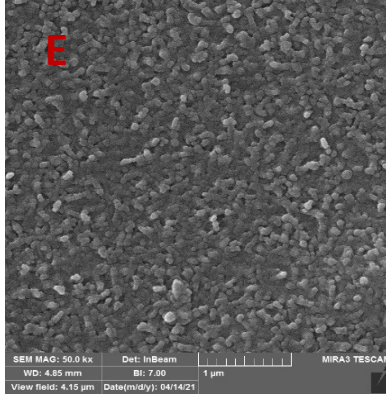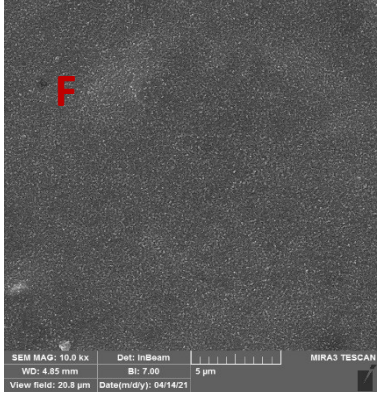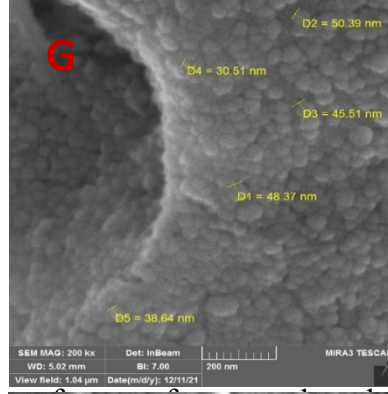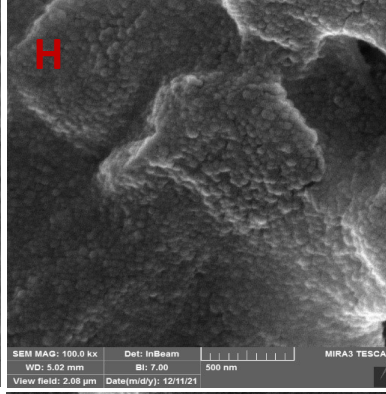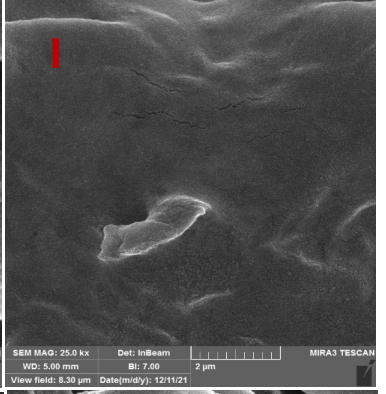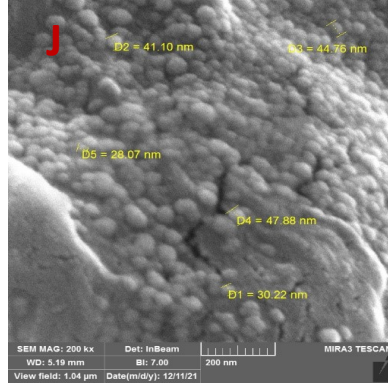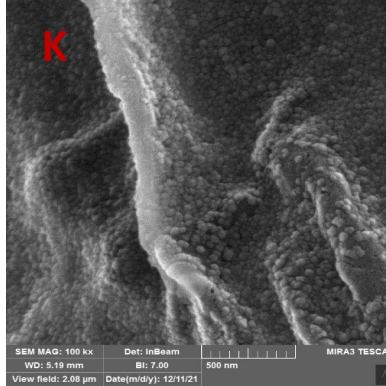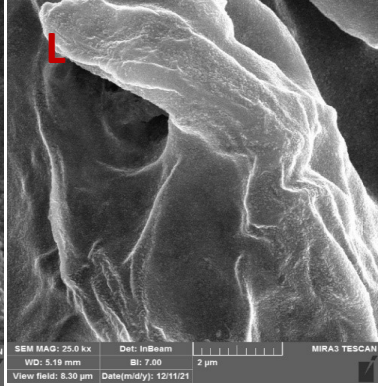

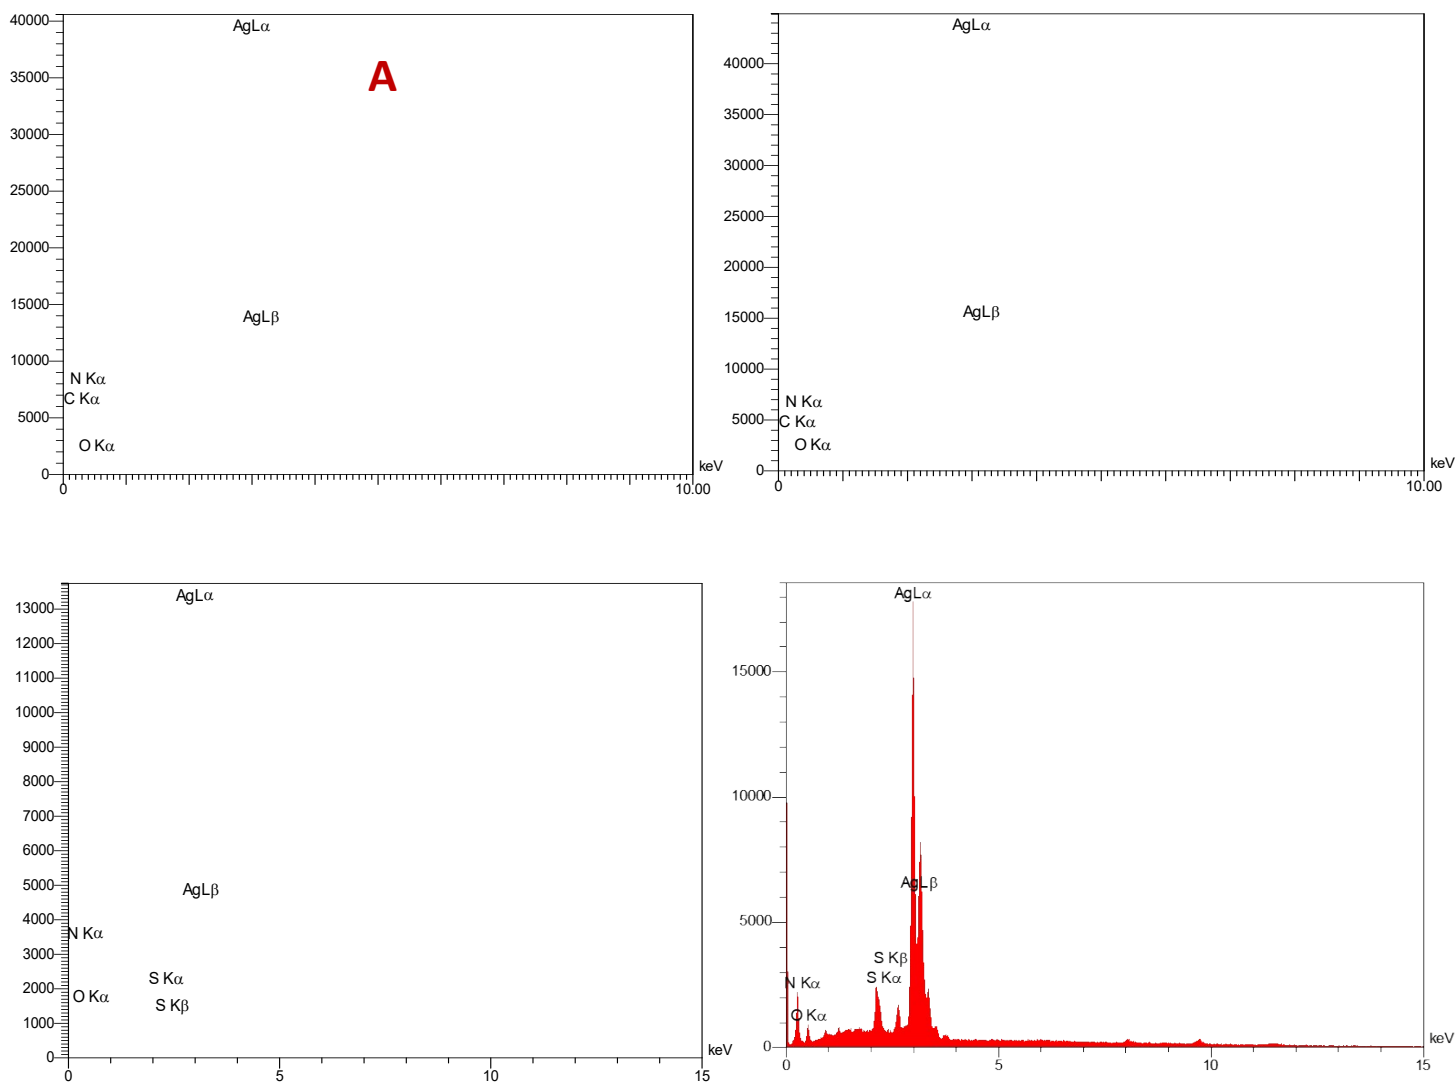

**Figure S2.** EDS results of **A:** bulk Ag ink (41), **B:** Ag ink/(KCC-1-NH-CS<sub>2</sub>)-Ab, and **C:** Ag ink/(KCC-1-NH-CS<sub>2</sub>)-Ab/BSA/Ag.

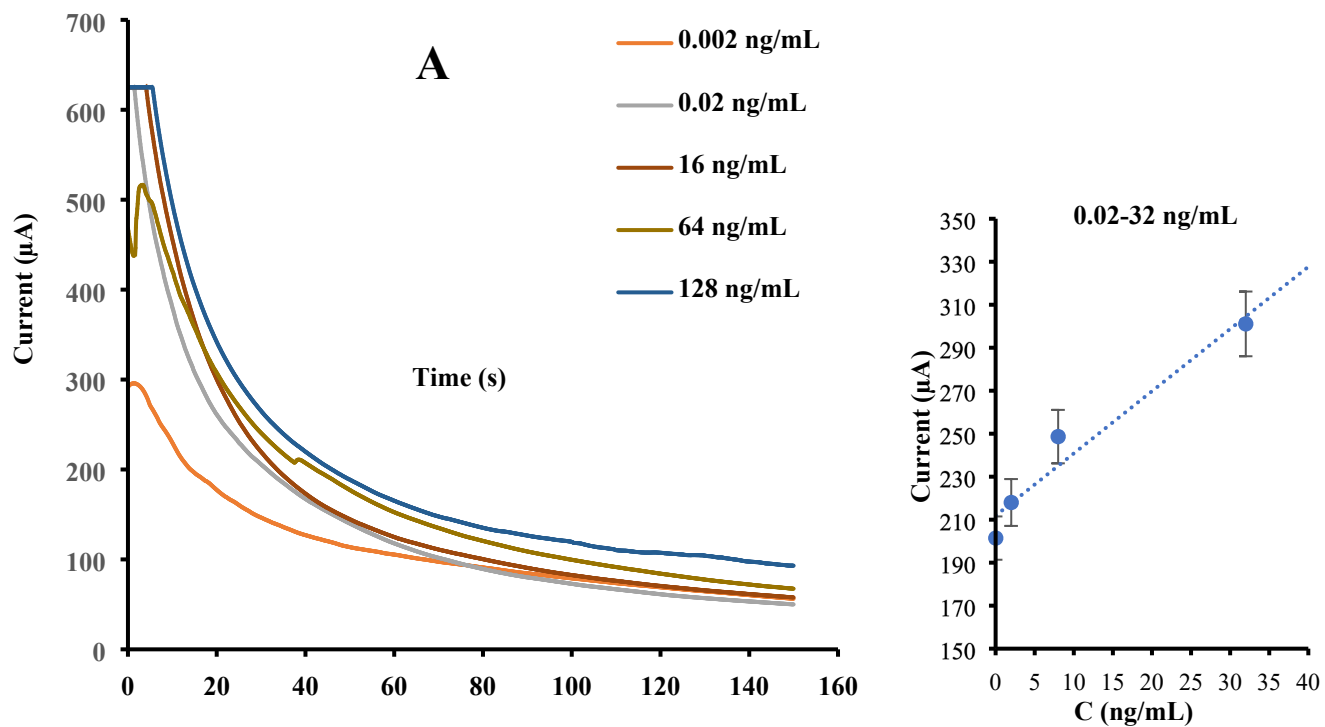

**Figure S3. A)** ChAs of immunosensor in the presence of various concentrations of  $\alpha$ -syn antigen (0.002, 0.02, 16, 64, and 128 ng/ml) spiked with human plasma samples in 0.01M  $[\text{Fe}(\text{CN})_6]^{3-/4-}$ /KCl solution as electrochemical probe in  $E=0.6$  V, duration time=150, **B)** Calibration curve of current intensity changes against  $\alpha$ -synuclein antigen concentrations spiked with human plasma samples.

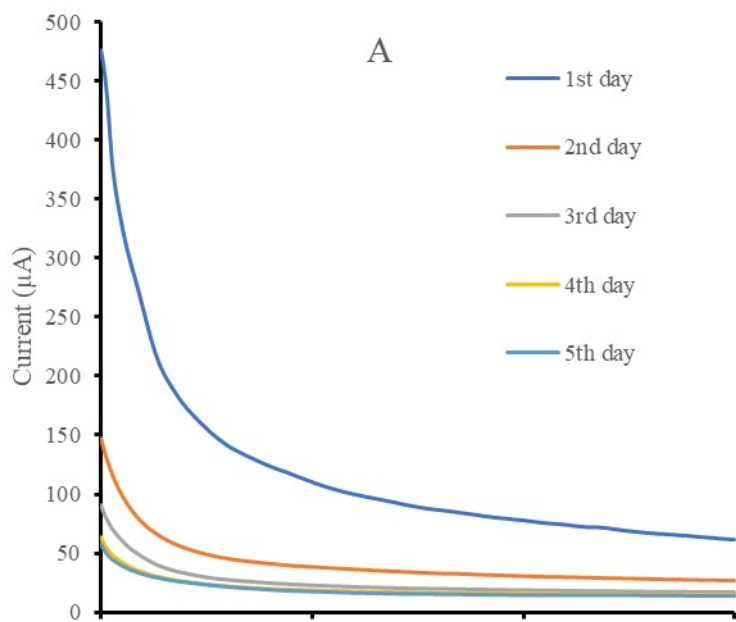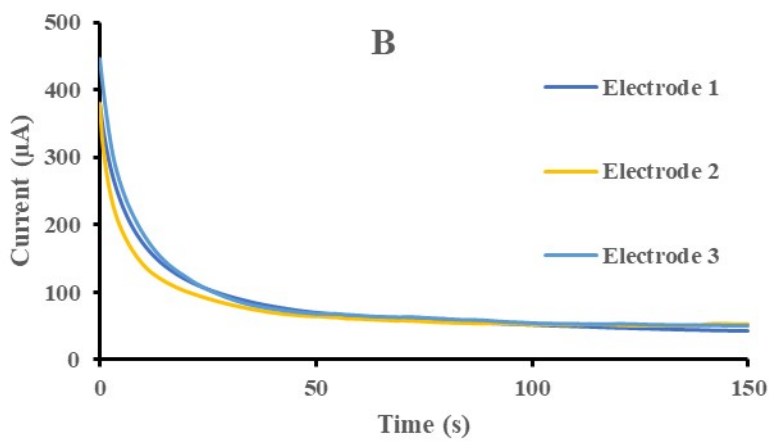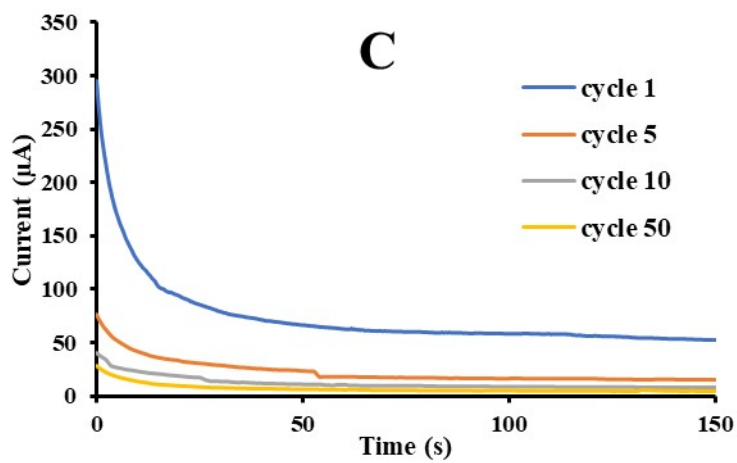

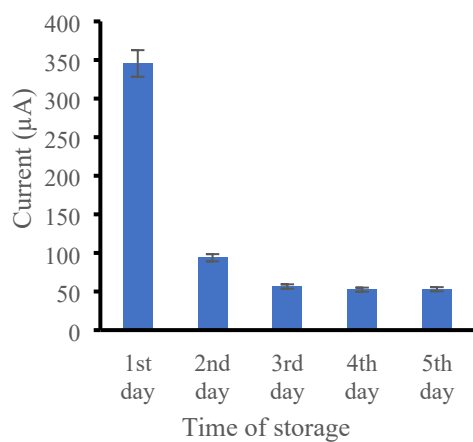

**a**

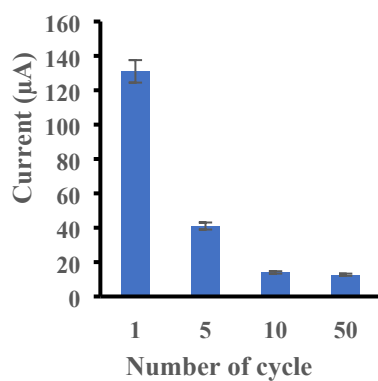

**c**

**Figure S4.** ChAs related to stability analysis of prepared sensor in the presence of 0.01M  $[\text{Fe}(\text{CN})_6]^{3-/4-}/\text{KCl}$  solution as electrochemical probe in  $E=0.25$  V, duration time=150: **A)** Inter-day stability and its histogram, **B)** Repeatability, and **C)** Cyclic stability and its histogram (c).

**Table S1.** The repeatability of  $\alpha$ -Syn immunosensor.

| Concentration(ng/ml) | I <sub>1</sub> /μA | I <sub>2</sub> /μA | I <sub>2</sub> /μA | SD   | AVE <sub>STDV</sub> |
|----------------------|--------------------|--------------------|--------------------|------|---------------------|
| 2                    | 278                | 276                | 270                | 3.59 | 2.26                |
| 8                    | 299                | 295                | 297                | 2.66 |                     |
| 32                   | 372                | 369                | 368                | 2.82 |                     |
| 128                  | 610                | 612                | 608                | 1.41 |                     |
